# Supplementary material for: Genetic Polymorphisms in Peroxisome Proliferator-Activated Receptor δ Associated With Obesity
Source: Oxford University Press journal article supplement (doi:10.2337/diabetes.53.3.847), 2004-03-01
Supplement: 847-sup-appendix--db03-0954r2.doc [file 847-sup-appendix--db03-0954r2.doc]

Supplemental Table. Single nucleotide polymorphisms (SNPs) in human *PPARD* gene and frequencies in Korean population (n=690)

| Locus* | Region | Genotype | | | |  | Minor allele freq. | Heterozygosity | HWE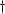 |
| --- | --- | --- | --- | --- | --- | --- | --- | --- | --- |
| c.-13454G>T1 | Intron3 | G | GT | T | N |  | T | 0.126 | 0.065 |
| 603 | 79 | 7 | 689 |  | 0.067 |
| c.-87T>C1 | 5'UTR | T | CT | C | N |  | C | 0.353 | 0.696 |
| 404 | 250 | 32 | 686 |  | 0.229 |
| c.2022+12G>A | intron10 | G | AG | A | N |  | A | 0.05 | 0.79 |
| 650 | 35 | 0 | 685 |  | 0.026 |
| c.2629T>C  (rs#1053049) | 3'UTR | T | CT | C | N |  | C | 0.351 | 0.63 |
| 406 | 250 | 31 | 687 |  | 0.227 |
| c.2806C>G  (rs#9794) | 3'UTR | C | CG | G | N |  | G | 0.333 | 0.837 |
| 425 | 234 | 28 | 687 |  | 0.211 |

*Nomenclature was based on the recommendation of HGVS (<http://www.hgvs.org/mutnomen/>)


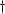
 Chi square P value for Hardy-Weinberg equilibrium.

Table ad2. Single nucleotide polymorphisms (SNPs) of the human *PPARD* gene and allele frequencies in each human races

| Loci | | Genotype | Korean | African American | Caucasian |
| --- | --- | --- | --- | --- | --- |
| PPARD | c.-13454G>T | G | 234(89.0%) | 50(100.0%) | 49(100.0%) |
|  |  | GT | 24(9.1%) | . | . |
|  |  | T | 5(1.9%) | . | . |
|  | c.-87T>C | T | 158(60.5%) | 25(50.0%) | 30(60.0%) |
|  |  | CT | 89(34.1%) | 22(44.0%) | 17(34.0%) |
|  |  | C | 14(5.4%) | 3(6.0%) | 3(6.0%) |
|  | c.2022+12G>A | G | 248(93.9%) | 50(100.0%) | 50(100.0%) |
|  |  | AG | 15(5.7%) | . | . |
|  |  | A | 1(0.4%) | . | . |
|  | c.2629T>C | T | 158(62.0%) | 7(14.0%) | 28(56.0%) |
|  |  | CT | 84(32.9%) | 27(54.0%) | 20(40.0%) |
|  |  | C | 13(5.1%) | 16(32.0%) | 2(4.0%) |
|  | c.2806C>G | C | 164(64.6%) | 35(77.8%) | 34(68.0%) |
|  |  | CG | 79(31.1%) | 9(20.0%) | 14(28.0%) |
|  |  | G | 11(4.3%) | 1(2.2%) | 2(4.0%) |

Table ad3. LD coefficients (|D'| and *r2*) among PPARD SNPs in Caucasian African American populations

|  | SNP* | c.-87T>C | c.2629T>C | c.2806C>G |
| --- | --- | --- | --- | --- |
| Caucasian | c.-87T>C | - | 0.886 | 1 |
|  | c.2629T>C | 0.786 | - | 1 |
|  | c.2806C>G | 0.734 | 0.734 | - |
|  |  |  |  |  |
| African American | c.-87T>C | - | 0.911 | 0.872 |
| c.2629T>C | 0.258 | - | 1 |
|  | c.2806C>G | 0.261 | 0.106 | - |

*Two SNPs (c.-13454G>T and c.2022+12G>A), which were not polymorphic in Caucasian and African American population were not included.

Table ad4. Regression analyses for age, BMI and sex adjusted diabetes phenotypes (total cholesterol, HDL-cholesterol, triglyceride and waist-hip ratio) with *PPARD* polymorphisms among type 2 diabetes patients

| Phenotype | Locus | C/C* | C/R* | R/R* |  | P | | |
| --- | --- | --- | --- | --- | --- | --- | --- | --- |
|  | Co-dominant | Dominant | Recessive |
| Total cholesterol | c.-13454G>T | 160(201.2±33.3) | 19(200.9±31.8) | . |  | 0.76 | 0.76 | . |
|  | c.-87T>C | 107(201.4±34.4) | 65(201.3±29.9) | 6(213±16.8) |  | 0.55 | 0.88 | 0.14 |
|  | c.2022+12G>A | 171(201.4±32) | 6(203.5±43.2) | . |  | 0.54 | 0.54 | . |
|  | c.2629T>C | 108(201.1±34.4) | 65(201.4±29.8) | 6(213±16.8) |  | 0.44 | 0.73 | 0.14 |
|  | c.2806C>G | 112(200.2±34.1) | 62(203.6±30.1) | 5(207.6±11.6) |  | 0.30 | 0.43 | 0.28 |
|  | ht1 | 13(214.1±23.1) | 76(197.9±30.6) | 88(202.7±34.5) |  | 0.46 | **0.03** | 0.83 |
| HDL-cholesterol | c.-13454G>T | 160(44±10.9) | 19(47.3±11.4) | . |  | 0.83 | 0.83 | . |
|  | c.-87T>C | 107(43.5±10.7) | 65(46.3±11.4) | 6(39.3±8.6) |  | 0.55 | 0.70 | 0.42 |
|  | c.2022+12G>A | 171(44.4±11) | 6(42.5±11.5) | . |  | 0.52 | 0.52 | . |
|  | c.2629T>C | 108(43.5±10.7) | 65(46.1±11.4) | 6(39.3±8.6) |  | 0.75 | 0.93 | 0.46 |
|  | c.2806C>G | 112(43.2±10.7) | 62(46.8±11.3) | 5(37.2±7.6) |  | 0.49 | 0.73 | 0.20 |
|  | ht1 | 13(43.7±10.2) | 76(45.9±11.6) | 88(43±10.6) |  | 0.48 | 0.16 | 0.89 |
| Triglyceride | c.-13454G>T | 157(135.7±70.7) | 19(126.7±63.6) | . |  | 0.64 | 0.64 | . |
|  | c.-87T>C | 105(134.5±70.6) | 64(135.9±70.9) | 6(136.2±53.4) |  | 0.55 | 0.33 | 0.22 |
|  | c.2022+12G>A | 168(135.5±70.6) | 6(134±50.1) | . |  | 0.43 | 0.43 | . |
|  | c.2629T>C | 106(137.3±72.8) | 64(133.8±69.7) | 6(136.2±53.4) |  | 0.55 | 0.33 | 0.22 |
|  | c.2806C>G | 110(136.1±72.1) | 61(134.9±70.8) | 5(148±50.1) |  | 0.55 | 0.33 | 0.22 |
|  | ht1 | 13(141.2±46.5) | 75(132.2±71.1) | 86(137.4±72.2) |  | 0.75 | 0.96 | 0.69 |
| Waist-hip ratio | c.-13454G>T | 53(0.9±0.1) | 6(0.9±0.1) | . |  | 0.17 | 0.17 | . |
|  | c.-87T>C | 34(0.9±0.1) | 23(0.9±0.1) | 1(0.8) |  | 0.54 | 0.26 | 0.25 |
|  | c.2022+12G>A | 52(0.9±0.1) | 5(0.8±0.1) | . |  | 0.52 | 0.52 | . |
|  | c.2629T>C | 34(0.9±0.1) | 23(0.9±0.1) | 1(0.8) |  | 0.58 | 0.29 | 0.26 |
|  | c.2806C>G | 34(0.9±0.1) | 23(0.9±0.1) | 1(0.8) |  | 0.40 | 0.14 | 0.12 |
|  | ht1 | 6(0.9±0.1) | 23(0.9±0.1) | 28(0.9±0.1) |  | 0.30 | 0.75 | 0.15 |

*C/C, C/R and R/R represent homozygotes for common allele, heterozygotes and homozygotes for rare allele. Haplotypes and their frequencies were inferred using the algorithm developed by Stephens et al (Stephens et al., 2001). Missing genotype data were omitted for exact haplotype construction. Genotype and haplotype distributions, means and standard deviations (SD) of each value, and P values of co-dominant models for regression analyses were shown.

Table ad5. Primer sequences for *PPARD* SNP screening

| Primer | Locus | Sequences | |
| --- | --- | --- | --- |
| PPARD-1p | promoter | Forward | 5’ - GGCGACAGAGTGAAACTGTGTCT- 3’ |
|  |  | Reverse | 5’ - AGAAAAGGTACGTGACTTGCAGTG- 3’ |
| *PPARD-2p* | promoter | Forward | 5’ - CTCTTGAAGGCGGAAAGCC- 3’ |
|  |  | Reverse | 5’ -CCTGCCAAAACTTTTCCCATT - 3’ |
| *PPARD-3p* | exon1 | Forward | 5’- CAGGAGGCGTGGTGATTGGC- 3’ |
|  |  | Reverse | 5’ -AGCTCCCCGCACCCCGTT- 3’ |
| *PPARD-4p* | exon2 | Forward | 5’ - TGAGCTTCTACCCAGCTCCC- 3’ |
|  |  | Reverse | 5’ - CCAGATGCTGTGACAGGAACC- 3’ |
| *PPARD-5p* | exon3 | Forward | 5’ - GGGATCTGCTCAGCAAGAGG- 3’ |
|  |  | Reverse | 5’ -GAATATAAGCCCCAGGAGGCA- 3’ |
| *PPARD-6p* | exon4 | Forward | 5’ - TGGGAAGGGTGATAGGGCA- 3’ |
|  |  | Reverse | 5’ - CTGGTGAGTGGCAGAGCAGA- 3’ |
| *PPARD-7p* | exon5 | Forward | 5’ - CCCAGCCCTGATGGTAATAGC- 3’ |
|  |  | Reverse | 5’ -TTCTCCTGCAGTGCCCAGA- 3’ |
| *PPARD-8p* | intron5 | Forward | 5’ - GCCACTGAGGCTGTGGTCA- 3’ |
|  |  | Reverse | 5’ - GCGACAGATCGAGATTCCATC- 3’ |
| *PPARD-9p* | intron5 | Forward | 5’ - CCGTGAGACAATCTTATGTTACCAAA- 3’ |
|  |  | Reverse | 5’ - TGGACAACAAGAGTGAAACTCCA- 3’ |
| *PPARD-10p* | intron5 | Forward | 5’ - ACTGTGTCCAGCCCCAACA- 3’ |
|  |  | Reverse | 5’ - CGTTGTGTGACATGCCCAG- 3’ |
| *PPARD-11p* | exon6 | Forward | 5’ - ATACATAATCGGGCCCTTTGGC- 3’ |
|  |  | Reverse | 5’ - TGGCTCCTGGCAGTTGACAAAT- 3’ |
| *PPARD-12p* | intron6 | Forward | 5’ - GAAAGCTACTGCCAAGGCCAG- 3’ |
|  |  | Reverse | 5’ - TGGGATTACAGGTGTGAGCCA- 3’ |
| *PPARD-13p* | intron6 | Forward | 5’ - GAAAAGTGGCCAGGTGCAGT- 3’ |
|  |  | Reverse | 5’ - GTGACAAAGGCCTGGGCTT- 3’ |
| *PPARD-14p* | intron6 | Forward | 5’ - GGTTGCAGTGAGCCGAGATC- 3’ |
|  |  | Reverse | 5’ - CTCCCCTCGTTTGCAGTCA- 3’ |
| *PPARD-15p* | exon7 | Forward | 5’ - AAAAGGATTTGGCCCATGC- 3’ |
|  |  | Reverse | 5’ - CCATTCACCAACTGCTTCCAC- 3’ |
| *PPARD-16p* | exon8 | Forward | 5’ - TGGTTTTCAGCCCTTTGTGAT- 3’ |
|  |  | Reverse | 5’ - TCAGAGCTCAGGCACAGTGC- 3’ |
| *PPARD-17p* | intron8 | Forward | 5’ - TCAACGCCCTGGAACTTGA- 3’ |
|  |  | Reverse | 5’ - CAGGGTCTCACTCTGTCACCC- 3’ |
| *PPARD-18p* | intron8 | Forward | 5’ - GCTGAGCCAGGAGAATCGC- 3’ |
|  |  | Reverse | 5’ - CCGTGACAGACCAAGCCCT- 3’ |
| *PPARD-19p* | exon9 | Forward | 5’ - GGGACAAATTGGCAAAAAACA- 3’ |
|  |  | Reverse | 5’ - GTGTCTGAGGGCGATCGTG- 3’ |
| *PPARD-20p* | exon10 | Forward | 5’ - TGACTTTTCCATTGACCAGCC - 3’ |
|  |  | Reverse | 5’ - CAGCAGGGACCCCATGACTA - 3’ |
| *PPARD-21p* | exon10 | Forward | 5’ - TAAGCATGGCCTGGACTGACT - 3’ |
|  |  | Reverse | 5’ - CCGTGGAGCCAGCTAGAGAA - 3’ |
| *PPARD-22p* | exon11 | Forward | 5’ - GTGGTTGGAGGAAGCAGCA - 3’ |
|  |  | Reverse | 5’ - CCGGACACTAGAGGCTGTGC - 3’ |
| *PPARD-23p* | exon11 | Forward | 5’ - TTTGTCCCAATAGCTCTACTGCC - 3’ |
|  |  | Reverse | 5’ - TGTCCCTTCATAGCCTTGGC - 3’ |
| *PPARD-24p* | exon11 | Forward | 5’ - CCATGCCCCAGGATCACTC - 3’ |
|  |  | Reverse | 5’ - AGGGCGGAAATGGCATAGT - 3’ |

Table ad6. Sequences of amplifying, extension primers for *PPARD* SNP genotyping by single base extension method

| Locus | Primer sequences | |
| --- | --- | --- |
| c.-13454G>T | Forward | 5’ - ACCCCTGGAAAACTGAAGCC - 3’ |
|  | Reverse | 5’ - CCCAGGAGGCAGAGATTTTTG - 3’ |
|  | Extension | 5’ - TGAACAGACGTCTTTTTGCAATTATGCCAGTT - 3’ |
| c.-87T>C | Forward | 5’ - CCTTGTCACTGCCTCCCCT - 3’ |
|  | Reverse | 5’ - CCATGGCTGATCTCCCCTC - 3’ |
|  | Extension | 5’ - GCCCAGGCTGATGGGAACCA - 3’ |
| c.2022+12G>A | Forward | 5’ - CATCTTCACACTGGTTTGCCA - 3’ |
|  | Reverse | 5’ - TCCCCCCTCCTTCTCTTGAG - 3’ |
|  | Extension | 5’ - TCATGATTATAATCAATGATGATTGATGGCCCCCTGCACTGGCC - 3’ |
| c.2629T>C | Forward | 5’ - GGCTGGAGTCTCAGAGCACAG - 3’ |
|  | Reverse | 5’ - AGCCCCAGGAAAAACATGC - 3’ |
|  | Extension | 5’-- TATAATCATGATTATAATCAATGATGATAAGTGCCCAGCCCCTGCCCCTA - 3’ |
| c.2806C>G | Forward | 5’ - GGCTGGAGTCTCAGAGCACAG - 3’ |
|  | Reverse | 5’ - AGCCCCAGGAAAAACATGC - 3’ |
|  | Extension | 5’ - AATGATTATATAATCATGATTATAATCAATGATGATCATGCCGCGTCCCTGCCCC - 3’ |

Fig. ad1**.** Sequence chromatogram of nine polymorphisms in *PPARD.* Red boxes indicate polymorphic sites.
